# Supplementary material for: Cross-species alignment along the chronological axis reveals evolutionary effect on structural development of the human brain
Source: eLife. 2024 Dec 9;13:e96020. doi: 10.7554/eLife.96020 (PMC11627501; doi:10.7554/eLife.96020)
Supplement: Figure 2—figure supplement 1—source data 1. — The first column shows the four brain parameters, the second column shows selected white matter tracts and gray matter regions within the brain parameters, and the third column shows the R value using Pearson’s correlation between the second column and ages. [file elife-96020-fig2-figsupp1-data1.xlsx]

## Sheet: Sheet1
Figure 2-figure supplement 1-source data 1. The information of 117 selected features of macaque. The first column shows the four brain parameters, the second column shows selected white matter tracts and gray matter regions within the brain parameters, and the third column shows the R-value using Pearson’s correlation between the second column and ages.
Parameter	Label	R
AD	Anterior Thalamic Radiation L	0.310515
	Anterior Thalamic Radiation R	0.257587
	Cingulum subsection: Dorsal L	0.155838
	Cingulum subsection: Dorsal R	0.120395
	Cingulum subsection: Peri-genual L	0.283199
	Frontal Aslant Tract L	0.158313
	Frontal Aslant Tract R	0.155573
	Middle Longitudinal Fasciculus L	0.157927
	Middle Longitudinal Fasciculus R	0.134326
	Superior Longitudinal Fasciculus 1 R	0.0505587
	Superior Longitudinal Fasciculus 3 L	0.130588
	Superior Thalamic Radiation L	0.0695019
	Superior Thalamic Radiation R	0.0598596
	Uncinate Fasciculus R	0.390793
MD	Anterior Thalamic Radiation L	0.29943
	Anterior Thalamic Radiation R	0.254014
	Cingulum subsection: Dorsal L	0.154067
	Cingulum subsection: Peri-genual L	0.286712
	Corticospinal Tract L	0.101542
	Frontal Aslant Tract L	0.148305
	Frontal Aslant Tract R	0.15952
	Superior Longitudinal Fasciculus 2 L	0.0976993
	Superior Longitudinal Fasciculus 2 R	0.0811678
	Superior Longitudinal Fasciculus 3 L	0.180708
	Superior Longitudinal Fasciculus 3 R	0.0680243
	Superior Thalamic Radiation L	0.0886076
	Superior Thalamic Radiation R	0.0717429
	Uncinate Fasciculus R	0.391543
RD	Acoustic Radiation R	0.140209
	Anterior Thalamic Radiation L	0.295985
	Anterior Thalamic Radiation R	0.253092
	Cingulum subsection: Dorsal L	0.183768
	Cingulum subsection: Peri-genual L	0.280009
	Corticospinal Tract L	0.200789
	Corticospinal Tract R	0.160216
	Frontal Aslant Tract R	0.159622
	Inferior Fronto-Occipital Fasciculus R	0.113319
	Optic Radiation L	0.211064
	Optic Radiation R	0.162103
	Superior Longitudinal Fasciculus 2 L	0.137743
	Superior Longitudinal Fasciculus 2 R	0.133621
	Superior Longitudinal Fasciculus 3 L	0.208972
	Superior Longitudinal Fasciculus 3 R	0.120123
	Superior Thalamic Radiation L	0.168324
	Superior Thalamic Radiation R	0.128624
	Uncinate Fasciculus R	0.384284
FA	Anterior Commissure	0.202436
	Acoustic Radiation R	0.324857
	Cingulum subsection: Dorsal R	0.120412
	Cingulum subsection: Peri-genual L	0.320217
	Corticospinal Tract L	0.391744
	Corticospinal Tract R	0.431268
	Frontal Aslant Tract L	0.208899
	Frontal Aslant Tract R	0.158352
	Forceps Major	0.270902
	Middle Longitudinal Fasciculus R	0.169827
	Optic Radiation L	0.254763
	Optic Radiation R	0.284831
	Superior Longitudinal Fasciculus 2 L	0.295799
	Superior Thalamic Radiation L	0.313735
	Superior Thalamic Radiation R	0.253462
	Uncinate Fasciculus R	0.324
Gray matter volume	temporal polar cortex	0.260769
	superior temporal cortex	0.306821
	orbitomedial prefrontal cortex	0.235264
	central temporal cortex	0.375294
	orbitolateral prefrontal cortex	0.290167
	gustatory cortex	0.23878
	ventrolateral premotor cortex	0.340857
	anterior visual area, ventral part	0.315897
	posterior insula	0.237175
	prefrontal polar cortex	0.389174
	ventrolateral prefrontal cortex	0.310243
	medial prefrontal cortex	0.333093
	centrolateral prefrontal cortex	0.386149
	posterior cingulate cortex	0.343195
	anterior cingulate cortex	0.450052
	primary somatosensory cortex	0.302742
	primary auditory cortex	0.231825
	inferior parietal cortex	0.348915
	medial parietal cortex	0.212324
	dorsomedial prefrontal cortex	0.371183
	intraparietal cortex	0.304353
	superior parietal cortex	0.386468
	frontal eye field	0.303072
	dorsolateral prefrontal cortex	0.436437
	medial premotor cortex	0.422923
	dorsolateral premotor cortex	0.402769
	Thalamic	0.193314
	temporal polar cortex	0.257187
	superior temporal cortex	0.2939
	orbitomedial prefrontal cortex	0.381015
	central temporal cortex	0.291259
	orbitolateral prefrontal cortex	0.255387
	inferior temporal cortex	0.283949
	ventrolateral premotor cortex	0.278435
	anterior visual area, ventral part	0.297195
	posterior insula	0.251607
	prefrontal polar cortex	0.384138
	subgenual cingulate cortex	0.278817
	ventrolateral prefrontal cortex	0.301715
	medial prefrontal cortex	0.357254
	ventral temporal cortex	0.252103
	centrolateral prefrontal cortex	0.401495
	retrosplenial cingulate cortex	0.276636
	posterior cingulate cortex	0.308647
	anterior cingulate cortex	0.460318
	primary somatosensory cortex	0.215279
	inferior parietal cortex	0.352078
	medial parietal cortex	0.183892
	dorsomedial prefrontal cortex	0.380429
	intraparietal cortex	0.268747
	superior parietal cortex	0.307737
	dorsolateral prefrontal cortex	0.414618
	medial premotor cortex	0.403147
	dorsolateral premotor cortex	0.394518
	Thalamic	0.205376
