# Supplementary material for: Cross-species alignment along the chronological axis reveals evolutionary effect on structural development of the human brain
Source: eLife. 2024 Dec 9;13:e96020. doi: 10.7554/eLife.96020 (PMC11627501; doi:10.7554/eLife.96020)
Supplement: Figure 2—figure supplement 1—source data 2. — The first column shows the four brain parameters, the second column shows selected white matter tracts and gray matter regions within the brain parameters, and the third column shows the R value using Pearson’s correlation between the second column and ages. [file elife-96020-fig2-figsupp1-data2.xlsx]

## Sheet: Sheet1
Figure 2-figure supplement 1-source data 2. The information of 239 selected features of human. The first column shows the four brain parameters, the second column shows selected white matter tracts and gray matter regions within the brain parameters, and the third column shows the R-value using Pearson’s correlation between the second column and ages.
Parameter	Label	R
AD	Anterior Commissure	0.544026
	Arcuate Fasciculus L	0.542491
	Arcuate Fasciculus R	0.48877
	Acoustic Radiation	0.53236
	Acoustic Radiation R	0.462682
	Anterior Thalamic Radiation L	0.486686
	Anterior Thalamic Radiation R	0.452297
	Cingulum subsection: Dorsal L	0.468992
	Cingulum subsection: Dorsal R	0.479529
	Cingulum subsection: Peri-genual L	0.381429
	Cingulum subsection: Peri-genual R	0.412496
	Cingulum subsection: Temporal L	0.500704
	Cingulum subsection: Temporal R	0.494585
	Corticospinal Tract L	0.373348
	Corticospinal Tract R	0.367101
	Frontal Aslant Tract L	0.445932
	Frontal Aslant Tract R	0.371131
	Forceps Major	0.215462
	Forceps Minor	0.322426
	Fornix L	0.467326
	Fornix R	0.380058
	Inferior Fronto-Occipital Fasciculus L	0.458183
	Inferior Fronto-Occipital Fasciculus R	0.334406
	Inferior Longitudinal Fasciculus L	0.218743
	Inferior Longitudinal Fasciculus R	0.391566
	Middle Cerebellar Peduncle	0.134831
	Middle Longitudinal Fasciculus L	0.458739
	Middle Longitudinal Fasciculus R	0.403827
	Optic Radiation L	0.375259
	Optic Radiation R	0.351937
	Superior Longitudinal Fasciculus 1 L	0.387594
	Superior Longitudinal Fasciculus 1 R	0.359668
	Superior Longitudinal Fasciculus 2 L	0.527929
	Superior Longitudinal Fasciculus 2 R	0.446315
	Superior Longitudinal Fasciculus 3 L	0.485967
	Superior Longitudinal Fasciculus 3 R	0.431502
	Superior Thalamic Radiation L	0.370389
	Superior Thalamic Radiation R	0.358463
	Uncinate Fasciculus L	0.371397
	Uncinate Fasciculus R	0.413126
	Vertical Occipital Fasciculus L	0.503983
	Vertical Occipital Fasciculus R	0.532372
MD	Anterior Commissure	0.491644
	Arcuate Fasciculus L	0.502896
	Arcuate Fasciculus R	0.481099
	Acoustic Radiation L	0.557014
	Acoustic Radiation R	0.523696
	Anterior Thalamic Radiation L	0.50779
	Anterior Thalamic Radiation R	0.453381
	Cingulum subsection: Dorsal L	0.479254
	Cingulum subsection: Dorsal R	0.478103
	Cingulum subsection: Peri-genual L	0.436953
	Cingulum subsection: Peri-genual R	0.4929
	Cingulum subsection: Temporal L	0.534658
	Cingulum subsection: Temporal R	0.513074
	Corticospinal Tract L	0.562593
	Corticospinal Tract R	0.491993
	Frontal Aslant Tract L	0.411421
	Frontal Aslant Tract R	0.300505
	Forceps Major	0.48403
	Forceps Minor	0.223067
	Fornix L	0.412336
	Fornix R	0.42098
	Inferior Fronto-Occipital Fasciculus L	0.555062
	Inferior Fronto-Occipital Fasciculus R	0.459467
	Inferior Longitudinal Fasciculus L	0.237479
	Inferior Longitudinal Fasciculus R	0.439954
	Middle Cerebellar Peduncle	0.223282
	Middle Longitudinal Fasciculus L	0.449016
	Middle Longitudinal Fasciculus R	0.459323
	Optic Radiation L	0.506845
	Optic Radiation R	0.435937
	Superior Longitudinal Fasciculus 1 L	0.497932
	Superior Longitudinal Fasciculus 1 R	0.477045
	Superior Longitudinal Fasciculus 2 L	0.500898
	Superior Longitudinal Fasciculus 2 R	0.490731
	Superior Longitudinal Fasciculus 3 L	0.482842
	Superior Longitudinal Fasciculus 3 R	0.44655
	Superior Thalamic Radiation L	0.418298
	Superior Thalamic Radiation R	0.323477
	Uncinate Fasciculus L	0.502649
	Uncinate Fasciculus R	0.462279
	Vertical Occipital Fasciculus L	0.548452
	Vertical Occipital Fasciculus R	0.556548
RD	Anterior Commissure	0.434556
	Arcuate Fasciculus L	0.443818
	Arcuate Fasciculus R	0.420115
	Acoustic Radiation L	0.49271
	Acoustic Radiation R	0.453158
	Anterior Thalamic Radiation L	0.496377
	Anterior Thalamic Radiation R	0.426079
	Cingulum subsection: Dorsal L	0.417754
	Cingulum subsection: Dorsal R	0.423569
	Cingulum subsection: Peri-genual L	0.386064
	Cingulum subsection: Peri-genual R	0.454095
	Cingulum subsection: Temporal L	0.509272
	Cingulum subsection: Temporal R	0.48586
	Corticospinal Tract L	0.535676
	Corticospinal Tract R	0.486055
	Frontal Aslant Tract L	0.381242
	Frontal Aslant Tract R	0.281185
	Forceps Major	0.415976
	Forceps Minor	0.133016
	Fornix L	0.304014
	Fornix R	0.352835
	Inferior Fronto-Occipital Fasciculus L	0.488052
	Inferior Fronto-Occipital Fasciculus R	0.438098
	Inferior Longitudinal Fasciculus L	0.198184
	Inferior Longitudinal Fasciculus R	0.411077
	Middle Cerebellar Peduncle	0.240555
	Middle Longitudinal Fasciculus L	0.396735
	Middle Longitudinal Fasciculus R	0.419078
	Optic Radiation L	0.45285
	Optic Radiation R	0.404322
	Superior Longitudinal Fasciculus 1 L	0.435363
	Superior Longitudinal Fasciculus 1 R	0.441206
	Superior Longitudinal Fasciculus 2 L	0.428438
	Superior Longitudinal Fasciculus 2 R	0.445646
	Superior Longitudinal Fasciculus 3 L	0.410162
	Superior Longitudinal Fasciculus 3 R	0.400603
	Superior Thalamic Radiation L	0.337682
	Superior Thalamic Radiation R	0.267664
	Uncinate Fasciculus L	0.500984
	Uncinate Fasciculus R	0.425853
	Vertical Occipital Fasciculus L	0.509262
	Vertical Occipital Fasciculus R	0.528094
FA	Anterior Commissure	0.224645
	Arcuate Fasciculus L	0.341291
	Arcuate Fasciculus R	0.312474
	Acoustic Radiation L	0.271003
	Acoustic Radiation R	0.201092
	Anterior Thalamic Radiation L	0.296804
	Anterior Thalamic Radiation R	0.251826
	Cingulum subsection: Dorsal L	0.278551
	Cingulum subsection: Dorsal R	0.264034
	Cingulum subsection: Peri-genual L	0.213663
	Cingulum subsection: Peri-genual R	0.164538
	Cingulum subsection: Temporal L	0.313077
	Cingulum subsection: Temporal R	0.241257
	Corticospinal Tract L	0.442184
	Corticospinal Tract R	0.416904
	Frontal Aslant Tract L	0.274414
	Frontal Aslant Tract R	0.24553
	Forceps Major	0.278821
	Inferior Fronto-Occipital Fasciculus L	0.347044
	Inferior Fronto-Occipital Fasciculus R	0.339378
	Inferior Longitudinal Fasciculus L	0.292689
	Inferior Longitudinal Fasciculus R	0.270097
	Middle Longitudinal Fasciculus L	0.306436
	Middle Longitudinal Fasciculus R	0.318454
	Optic Radiation L	0.322867
	Optic Radiation R	0.253862
	Superior Longitudinal Fasciculus 1 L	0.326946
	Superior Longitudinal Fasciculus 1 R	0.409469
	Superior Longitudinal Fasciculus 2 L	0.203821
	Superior Longitudinal Fasciculus 2 R	0.289962
	Superior Longitudinal Fasciculus 3 L	0.163107
	Superior Longitudinal Fasciculus 3 R	0.197618
	Superior Thalamic Radiation L	0.303172
	Superior Thalamic Radiation R	0.329085
	Uncinate Fasciculus L	0.299625
	Vertical Occipital Fasciculus L	0.229627
	Vertical Occipital Fasciculus R	0.189845
Gray matter volume	superior temporal cortex	0.249501
	Amygdala	0.211382
	orbitoinferior prefrontal cortex	0.371023
	anterior insula	0.218048
	orbitomedial prefrontal cortex	0.254998
	central temporal cortex	0.244851
	orbitolateral prefrontal cortex	0.275297
	inferior temporal cortex	0.241958
	parahippocampal cortex	0.28193
	gustatory cortex	0.231792
	ventrolateral premotor cortex	0.363612
	anterior visual area, ventral part	0.257583
	posterior insula	0.35239
	prefrontal polar cortex	0.226895
	subgenual cingulate cortex	0.287695
	ventrolateral prefrontal cortex	0.317392
	visual area 2 (secondary visual cortex)	0.29264
	medial prefrontal cortex	0.157691
	ventral temporal cortex	0.204891
	anterior visual area, dorsal part	0.27821
	visual area 1 (primary visual cortex)	0.209148
	secondary auditory cortex	0.27856
	retrosplenial cingulate cortex	0.247976
	posterior cingulate cortex	0.325139
	anterior cingulate cortex	0.228598
	secondary somatosensory cortex	0.242669
	primary somatosensory cortex	0.350772
	primary auditory cortex	0.266357
	primary motor cortex	0.341223
	inferior parietal cortex	0.239751
	medial parietal cortex	0.264934
	intraparietal cortex	0.270626
	superior parietal cortex	0.234238
	medial premotor cortex	0.177412
	dorsolateral premotor cortex	0.215312
	Thalamic	0.332848
	caudate nucleus	0.172478
	Putamen	0.45359
	Pallidum	0.434993
	accumbens nucleus	0.266264
	superior temporal cortex	0.325888
	Amygdala	0.186126
	anterior insula	0.227115
	orbitomedial prefrontal cortex	0.184632
	central temporal cortex	0.250148
	inferior temporal cortex	0.268574
	parahippocampal cortex	0.277532
	gustatory cortex	0.19847
	ventrolateral premotor cortex	0.215978
	anterior visual area, ventral part	0.15382
	posterior insula	0.423925
	prefrontal polar cortex	0.137518
	subgenual cingulate cortex	0.183899
	visual area 2 (secondary visual cortex)	0.266925
	ventral temporal cortex	0.238773
	anterior visual area, dorsal part	0.294444
	visual area 1 (primary visual cortex)	0.180903
	secondary auditory cortex	0.277033
	retrosplenial cingulate cortex	0.304646
	posterior cingulate cortex	0.344216
	anterior cingulate cortex	0.222684
	secondary somatosensory cortex	0.278624
	primary somatosensory cortex	0.362585
	primary auditory cortex	0.266259
	primary motor cortex	0.290894
	inferior parietal cortex	0.251835
	medial parietal cortex	0.256017
	intraparietal cortex	0.363882
	superior parietal cortex	0.267089
	medial premotor cortex	0.175004
	dorsolateral premotor cortex	0.205232
	Thalamic	0.365043
	caudate nucleus	0.20535
	Putamen	0.183399
	Pallidum	0.44478
	accumbens nucleus	0.188609
