# Supplementary material for: Cross-species alignment along the chronological axis reveals evolutionary effect on structural development of the human brain
Source: eLife. 2024 Dec 9;13:e96020. doi: 10.7554/eLife.96020 (PMC11627501; doi:10.7554/eLife.96020)
Supplement: Figure 2—source data 1. — The first column shows the four brain parameters, the second column shows selected white matter tracts and gray matter regions within the brain parameters, and the third column shows the R value using Pearson’s correlation between the second column and ages. [file elife-96020-fig2-data1.xlsx]

## Sheet: Sheet1
Figure 2-source data 1. The information of 62 selected features of macaque. The first column shows the four brain parameters, the second column shows selected white matter tracts and gray matter regions within the brain parameters, and the third column shows the R-value using Pearson’s correlation between the second column and ages.
Parameter	Label	R
AD	Anterior Thalamic Radiation L	0.288256
	Anterior Thalamic Radiation R	0.241538
	Cingulum subsection: Peri-genual L	0.278241
	Uncinate Fasciculus R	0.369415
MD	Anterior Thalamic Radiation L	0.277169
	Anterior Thalamic Radiation R	0.240927
	Cingulum subsection: Peri-genual L	0.28193
	Uncinate Fasciculus R	0.372363
RD	Anterior Thalamic Radiation L	0.272095
	Anterior Thalamic Radiation R	0.242112
	Cingulum subsection: Peri-genual L	0.278939
	Uncinate Fasciculus R	0.366766
FA	Acoustic Radiation R	0.301879
	Cingulum subsection: Peri-genual L	0.322917
	Corticospinal Tract L	0.374637
	Corticospinal Tract R	0.418902
	Forceps Major	0.261145
	Superior Longitudinal Fasciculus 2 L	0.306707
	Superior Thalamic Radiation L	0.304601
	Superior Thalamic Radiation R	0.272581
	Uncinate Fasciculus R	0.290117
Gray matter volume	temporal polar cortex	0.229333
	superior temporal cortex	0.304711
	central temporal cortex	0.370814
	ventrolateral premotor cortex	0.305829
	anterior visual area, ventral part	0.335179
	prefrontal polar cortex	0.334492
	ventrolateral prefrontal cortex	0.286612
	medial prefrontal cortex	0.272261
	centrolateral prefrontal cortex	0.334116
	posterior cingulate cortex	0.368408
	anterior cingulate cortex	0.427413
	primary somatosensory cortex	0.329807
	inferior parietal cortex	0.390779
	dorsomedial prefrontal cortex	0.301644
	intraparietal cortex	0.354363
	superior parietal cortex	0.422773
	dorsolateral prefrontal cortex	0.400255
	medial premotor cortex	0.396633
	dorsolateral premotor cortex	0.370951
	superior temporal cortex	0.28294
	orbitomedial prefrontal cortex	0.347839
	central temporal cortex	0.303552
	inferior temporal cortex	0.262842
	ventrolateral premotor cortex	0.298548
	anterior visual area, ventral part	0.34252
	posterior insula	0.306056
	prefrontal polar cortex	0.324477
	subgenual cingulate cortex	0.301288
	medial prefrontal cortex	0.313711
	ventral temporal cortex	0.283435
	centrolateral prefrontal cortex	0.342716
	retrosplenial cingulate cortex	0.293057
	posterior cingulate cortex	0.339358
	anterior cingulate cortex	0.469351
	inferior parietal cortex	0.403521
	dorsomedial prefrontal cortex	0.342656
	intraparietal cortex	0.31969
	superior parietal cortex	0.346272
	dorsolateral prefrontal cortex	0.372306
	medial premotor cortex	0.423481
	dorsolateral premotor cortex	0.386239
