# Supplementary material for: Cross-species alignment along the chronological axis reveals evolutionary effect on structural development of the human brain
Source: eLife. 2024 Dec 9;13:e96020. doi: 10.7554/eLife.96020 (PMC11627501; doi:10.7554/eLife.96020)
Supplement: Figure 2—source data 2. — The first column shows the four brain parameters, the second column shows selected white matter tracts and gray matter regions within the brain parameters, and the third column shows the R value using Pearson’s correlation between the second column and ages. [file elife-96020-fig2-data2.xlsx]

## Sheet: Sheet1
Figure 2-source data 2. The information of 225 selected features of human. The first column shows the four brain parameters, the second column shows selected white matter tracts and gray matter regions within the brain parameters, and the third column shows the R-value using Pearson’s correlation between the second column and ages.
Parameter	Label	R
AD	Anterior Commissure	0.564774
	Arcuate Fasciculus L	0.54815
	Arcuate Fasciculus	0.483443
	Acoustic Radiation	0.518646
	Acoustic Radiation R	0.472836
	Anterior Thalamic Radiation L	0.499939
	Anterior Thalamic Radiation R	0.47407
	Cingulum subsection: Dorsal L	0.484279
	Cingulum subsection: Dorsal R	0.495314
	Cingulum subsection: Peri-genual L	0.410303
	Cingulum subsection: Peri-genual R	0.43481
	Cingulum subsection: Temporal L	0.507176
	Cingulum subsection: Temporal R	0.494184
	Corticospinal Tract L	0.347542
	Corticospinal Tract R	0.341705
	Frontal Aslant Tract L	0.453226
	Frontal Aslant Tract R	0.394202
	Forceps Major	0.246233
	Forceps Minor	0.361209
	Fornix L	0.481172
	Fornix R	0.386836
	Inferior Fronto-Occipital Fasciculus L	0.471243
	Inferior Fronto-Occipital Fasciculus R	0.363319
	Inferior Longitudinal Fasciculus L	0.237268
	Inferior Longitudinal Fasciculus R	0.395736
	Middle Longitudinal Fasciculus L	0.456178
	Middle Longitudinal Fasciculus R	0.408704
	Optic Radiation L	0.401048
	Optic Radiation R	0.365872
	Superior Longitudinal Fasciculus 1 L	0.380011
	Superior Longitudinal Fasciculus 1 R	0.358294
	Superior Longitudinal Fasciculus 2 L	0.540075
	Superior Longitudinal Fasciculus 2 R	0.452917
	Superior Longitudinal Fasciculus 3 L	0.48606
	Superior Longitudinal Fasciculus 3 R	0.432991
	Superior Thalamic Radiation L	0.368529
	Superior Thalamic Radiation R	0.349797
	Uncinate Fasciculus L	0.390158
	Uncinate Fasciculus R	0.426991
	Vertical Occipital Fasciculus L	0.52745
	Vertical Occipital Fasciculus R	0.51745
MD	Anterior Commissure	0.503142
	Arcuate Fasciculus L	0.520482
	Arcuate Fasciculus R	0.490223
	Acoustic Radiation	0.549323
	Acoustic Radiation R	0.530074
	Anterior Thalamic Radiation L	0.528012
	Anterior Thalamic Radiation R	0.480146
	Cingulum subsection: Dorsal L	0.510681
	Cingulum subsection: Dorsal R	0.494074
	Cingulum subsection: Peri-genual L	0.466301
	Cingulum subsection: Peri-genual R	0.491003
	Cingulum subsection: Temporal L	0.533084
	Cingulum subsection: Temporal R	0.508398
	Corticospinal Tract L	0.571493
	Corticospinal Tract R	0.504064
	Frontal Aslant Tract L	0.418762
	Frontal Aslant Tract R	0.333653
	Forceps Major	0.464233
	Forceps Minor	0.259015
	Fornix L	0.421012
	Fornix R	0.421871
	Inferior Fronto-Occipital Fasciculus L	0.567324
	Inferior Fronto-Occipital Fasciculus R	0.472641
	Inferior Longitudinal Fasciculus L	0.264472
	Inferior Longitudinal Fasciculus R	0.446907
	Middle Cerebellar Peduncle	0.216898
	Middle Longitudinal Fasciculus L	0.439938
	Middle Longitudinal Fasciculus R	0.45563
	Optic Radiation L	0.502641
	Optic Radiation R	0.425826
	Superior Longitudinal Fasciculus 1 L	0.495467
	Superior Longitudinal Fasciculus 1 R	0.474506
	Superior Longitudinal Fasciculus 2 L	0.511203
	Superior Longitudinal Fasciculus 2 R	0.485455
	Superior Longitudinal Fasciculus 3 L	0.473489
	Superior Longitudinal Fasciculus 3 R	0.444915
	Superior Thalamic Radiation L	0.429696
	Superior Thalamic Radiation R	0.319234
	Uncinate Fasciculus L	0.507344
	Uncinate Fasciculus R	0.473689
	Vertical Occipital Fasciculus L	0.563128
	Vertical Occipital Fasciculus R	0.539579
RD	Anterior Commissure	0.440907
	Arcuate Fasciculus L	0.457266
	Arcuate Fasciculus R	0.428703
	Acoustic Radiation L	0.489902
	Acoustic Radiation R	0.457484
	Anterior Thalamic Radiation L	0.508441
	Anterior Thalamic Radiation R	0.454708
	Cingulum subsection: Dorsal L	0.445238
	Cingulum subsection: Dorsal R	0.435121
	Cingulum subsection: Peri-genual L	0.409834
	Cingulum subsection: Peri-genual R	0.451113
	Cingulum subsection: Temporal L	0.505873
	Cingulum subsection: Temporal R	0.480585
	Corticospinal Tract L	0.5527
	Corticospinal Tract R	0.511226
	Frontal Aslant Tract L	0.386254
	Frontal Aslant Tract R	0.317126
	Forceps Major	0.379547
	Fornix L	0.302328
	Fornix R	0.359128
	Inferior Fronto-Occipital Fasciculus L	0.506548
	Inferior Fronto-Occipital Fasciculus R	0.45218
	Inferior Longitudinal Fasciculus L	0.230146
	Inferior Longitudinal Fasciculus R	0.414711
	Middle Cerebellar Peduncle	0.228629
	Middle Longitudinal Fasciculus L	0.387764
	Middle Longitudinal Fasciculus R	0.41359
	Optic Radiation L	0.442359
	Optic Radiation R	0.398548
	Superior Longitudinal Fasciculus 1 L	0.439828
	Superior Longitudinal Fasciculus 1 R	0.434941
	Superior Longitudinal Fasciculus 2 L	0.446011
	Superior Longitudinal Fasciculus 2 R	0.439081
	Superior Longitudinal Fasciculus 3 L	0.400436
	Superior Longitudinal Fasciculus 3 R	0.391471
	Superior Thalamic Radiation L	0.34683
	Superior Thalamic Radiation R	0.257683
	Uncinate Fasciculus L	0.502366
	Uncinate Fasciculus R	0.436391
	Vertical Occipital Fasciculus L	0.525251
	Vertical Occipital Fasciculus R	0.510449
FA	Anterior Commissure	0.218531
	Arcuate Fasciculus L	0.345863
	Arcuate Fasciculus R	0.312452
	Acoustic Radiation L	0.286146
	Acoustic Radiation R	0.21003
	Anterior Thalamic Radiation L	0.310607
	Anterior Thalamic Radiation R	0.279201
	Cingulum subsection: Dorsal L	0.29805
	Cingulum subsection: Dorsal R	0.266571
	Cingulum subsection: Peri-genual L	0.234121
	Cingulum subsection: Temporal L	0.300302
	Cingulum subsection: Temporal R	0.205152
	Corticospinal Tract L	0.46539
	Corticospinal Tract R	0.449906
	Frontal Aslant Tract L	0.267615
	Frontal Aslant Tract R	0.260998
	Forceps Major	0.231645
	Inferior Fronto-Occipital Fasciculus L	0.366528
	Inferior Fronto-Occipital Fasciculus R	0.344543
	Inferior Longitudinal Fasciculus L	0.265502
	Inferior Longitudinal Fasciculus R	0.220091
	Middle Longitudinal Fasciculus L	0.307859
	Middle Longitudinal Fasciculus R	0.303441
	Optic Radiation L	0.294374
	Optic Radiation R	0.241667
	Superior Longitudinal Fasciculus 1 L	0.344291
	Superior Longitudinal Fasciculus 1 R	0.413837
	Superior Longitudinal Fasciculus 2 R	0.273171
	Superior Thalamic Radiation L	0.321245
	Superior Thalamic Radiation R	0.334399
	Uncinate Fasciculus L	0.307619
	Vertical Occipital Fasciculus L	0.161543
Gray matter volume	superior temporal cortex	0.271749
	Amygdala	0.221581
	orbitoinferior prefrontal cortex	0.360694
	anterior insula	0.206132
	orbitomedial prefrontal cortex	0.246024
	central temporal cortex	0.270769
	orbitolateral prefrontal cortex	0.303922
	inferior temporal cortex	0.257672
	parahippocampal cortex	0.280816
	gustatory cortex	0.219526
	ventrolateral premotor cortex	0.398676
	anterior visual area, ventral part	0.293898
	posterior insula	0.391544
	prefrontal polar cortex	0.234666
	subgenual cingulate cortex	0.303557
	ventrolateral prefrontal cortex	0.342546
	visual area 2 (secondary visual cortex)	0.324458
	ventral temporal cortex	0.210454
	anterior visual area, dorsal part	0.331335
	visual area 1 (primary visual cortex)	0.225428
	secondary auditory cortex	0.319071
	retrosplenial cingulate cortex	0.239633
	posterior cingulate cortex	0.348152
	anterior cingulate cortex	0.218295
	secondary somatosensory cortex	0.277408
	primary somatosensory cortex	0.338385
	primary auditory cortex	0.319612
	primary motor cortex	0.362056
	inferior parietal cortex	0.25046
	medial parietal cortex	0.292
	intraparietal cortex	0.276541
	superior parietal cortex	0.245472
	dorsolateral premotor cortex	0.222736
	Thalamic	0.308525
	Putamen	0.443674
	Pallidum	0.388433
	accumbens nucleus	0.257052
	superior temporal cortex	0.352029
	Amygdala	0.18513
	anterior insula	0.214444
	central temporal cortex	0.264297
	inferior temporal cortex	0.280743
	parahippocampal cortex	0.292784
	gustatory cortex	0.212275
	ventrolateral premotor cortex	0.246236
	posterior insula	0.447733
	subgenual cingulate cortex	0.176334
	visual area 2 (secondary visual cortex)	0.28743
	ventral temporal cortex	0.223226
	anterior visual area, dorsal part	0.320688
	visual area 1 (primary visual cortex)	0.224857
	secondary auditory cortex	0.297258
	retrosplenial cingulate cortex	0.316114
	posterior cingulate cortex	0.353882
	anterior cingulate cortex	0.208749
	secondary somatosensory cortex	0.350517
	primary somatosensory cortex	0.370321
	primary auditory cortex	0.30385
	primary motor cortex	0.282575
	inferior parietal cortex	0.271753
	medial parietal cortex	0.278989
	intraparietal cortex	0.366979
	superior parietal cortex	0.25018
	medial premotor cortex	0.18126
	dorsolateral premotor cortex	0.194178
	Thalamic	0.337551
	caudate nucleus	0.216461
	Pallidum	0.428407
	accumbens nucleus	0.180903
