# Supplementary material for: Cross-species alignment along the chronological axis reveals evolutionary effect on structural development of the human brain
Source: eLife. 2024 Dec 9;13:e96020. doi: 10.7554/eLife.96020 (PMC11627501; doi:10.7554/eLife.96020)
Supplement: Figure 5—source data 1. — The significant results (p<0.05) corrected using FDR-BH are in bold. [file elife-96020-fig5-data1.xlsx]

## Sheet: Sheet1
Figure 5-source data 1. The information of available behavioral phenotypes and their Pearson’s correlation results with BCAP (not all the participants have all the behavioral tests). The significant results (p < 0.05) corrected using FDR-BH were made bold.
Behaviors Scale Name	R
ORRT	0.0334
Preschool Child Observation Program Behavior Sample	0.0517
Mini-Mental State Examination	-0.0423
Picture Vocabulary Test	0.1588
Urgency, Premeditation, Perseverance, Sensation Seeking, and Positive Urgency	-0.0332
Vision-tests	0.0354
Wechsler Intelligence Scale for Children	0.0378
Cogcomp	0.0867
Dimensional Change Card Sort	0.0441
LSWMT	-0.0025
Emotional Assessment Test	0.0886
Edinburgh-hand	-0.0107
Emotional Reactivity	0.0772
Behavioral Inhibition System/Behavioral Activation System Scale	-0.0327
Child Behavior Checklist	0.0824
Child Behavior Questionnaire	0.1789
FENVS	-0.0747
Youth Self-Report	0.1063
Sleepdis01	-0.1866
Press Management Scale	-0.0213
Perceived Stress Scale	0.0868
Strengths and Difficulties Questionnaire	-0.1186
Perceived Stress Reaction and Symptoms Inventory	0.1336
Prang01	0.1198
General Behavior Inventory	-0.0882
Self-effic01	-0.0571
Flanker01	0.0128
Patient-Reported Outcomes Measurement Information System	-0.1123
Social responsiveness Scale	0.1457
Tlbx-empbeh01	0.097
Tlbx-emsup01	-0.0715
Tlbx-fearanx01	0.0366
Tlbx-friend01	-0.0446
Tlbx-motor01	-0.0084
Tlbx-perhost01	0.0366
Tlbx-rej01	0.0687
Tlbx-sadness01	0.1666
Visual acuity test	-0.2051
Tlbx-socwit01	-0.1127
Tlbx-wellbeing01	-0.0754
